# Supplementary material for: Transfusion practice in the bleeding critically ill: An international online survey—The TRACE‐2 survey
Source: PubMed Central journal article supplement — Transfusion. 2021 Dec 31;62(2):324–35. doi: 10.1111/trf.16789 (PMC9305497; doi:10.1111/trf.16789), 2021-12-31
Supplement: TRF-62-324-s001.pdf [file TRF-62-324-s001.pdf]

# **Transfusion practice in the bleeding critically ill; an international online survey – The TRACE-2 Survey**

## **Supplement 1: Static version online survey**

**Demographics:**

1. In which country do you work?
2. What is your intensive care certification level?
  - a. Intensivist
  - b. Resident, specialist in training
  - c. Specialist non intensivist practicing ICU
  - d. Nurse
  - e. Student
  - f. Other, please specify
3. What is your primary medical speciality?
  - a. Anesthesiology
  - b. Cardiology
  - c. Internal medicine
  - d. Neurology
  - e. Pediatrics
  - f. Pulmonology
  - g. Surgery
  - h. Other, please specify
4. Type of intensive care unit (ICU)
  - a. Medical ICU
  - b. Surgical ICU
  - c. Mixed ICU
  - d. Other, please specify
5. Number of ICU beds
  - a. <10
  - b. 10-15
  - c. 16-20
  - d. >20
6. Type of institution
  - a. University hospital
  - b. University affiliated hospital
  - c. Non-university public hospital
  - d. Private hospital
  - e. Other, please specify
7. What kind of transfusion protocol do you have in your hospital? (multiple answers possible)
  - a. Hospital-wide transfusion protocol
  - b. ICU-specific transfusion protocol
  - c. Massive transfusion protocol
  - d. Other, please specify

## Massive transfusion

The following questions concern ICU patients that have massive blood loss.

*Massive blood loss is defined as:*

*Systolic blood pressure <90mmHg with bleeding + non-responsive to resuscitation therapy*

*OR ≥4 products within 2 hours*

*OR When a massive transfusion protocol (MTP) is initiated*

8. What kind of plasma do you use during massive transfusion? (multiple answers possible)
  - a. Pooled plasma (e.g. Omniplasma)
  - b. Fresh frozen plasma
  - c. Lyophilized plasma
  
9. What guides the choice of type of blood products prescribed to patients with requiring massive transfusion? (multiple answers possible)
  - a. I use fixed ratios of blood products
  - b. Conventional lab based testing (e.g. INR, platelet count, fibrinogen, hemoglobin)
  - c. Point of care viscoelastic testing (TEG/ROTEM)
  
10. What ratio of blood products do you use in your massive transfusion protocol? (one platelet concentrate = pooled product from 5 donors)
  - a. 1 : 1 : 1 (red blood cells : plasma : platelets concentrate)
  - b. 3 : 3 : 1 (red blood cells : plasma : platelets concentrate)
  - c. 6 : 6 : 1 (red blood cells : plasma : platelets concentrate)
  - d. 6 : 3 : 1 (red blood cells : plasma : platelets concentrate)
  - e. Whole blood
  - f. Other, please specify
  
11. How do you correct a plasmatic coagulopathy (International Normalized Ratio > x1.5 reference value or prolonged cloth time with TEG/ROTEM) in critically ill patients with massive blood loss in the ICU who used vitamin K antagonists? (multiple answers possible)
  - a. Vitamin K
  - b. Prothrombin complex (Cofact/Octoplex/Beriplex)
  - c. Plasma
  - d. Nothing
  - e. Other, please specify
  
12. How do you correct a plasmatic coagulopathy in critically ill patients with massive blood loss in the ICU who used direct oral anti-coagulants (DOAC's)? (multiple answers possible)
  - a. Vitamin K
  - b. Prothrombin complex (Cofact/Octoplex/Beriplex)
  - c. Plasma
  - d. Recombinant factor VIIa
  - e. Idarucizumab (for dabigatran)
  - f. Andexanet (for rivaroxaban or apixaban)
  - g. Nothing
  - h. Other, please specify
  
13. What guides your use of fibrinogen in critically ill patients with massive bleeding? (multiple answers possible)
  - a. I empirically administer fibrinogen

- b. I empirically administer fibrinogen, but start titrating when first lab results are available
- c. I administer fibrinogen after lab testing (fibrinogen level)
- d. I administer fibrinogen after viscoelastic testing (TEG/ROTEM)
- e. Other, please specify

14. What guides your use of prothrombin complex (Cofact/Octoplex/Beriplex) in critically ill patients with massive bleeding? (multiple answers possible)

- a. I empirically administer prothrombin complex
- b. I empirically administer prothrombin complex, but start titrating when first lab results are available
- c. I administer prothrombin complex after lab testing (INR/PT)
- d. I administer prothrombin complex after viscoelastic testing (TEG/ROTEM)
- e. Other, please specify

15. Do you use tranexamic acid in critically ill patients with massive bleeding?

- a. Yes
- b. No

16. What guides your use of tranexamic acid in critically ill patients with massive bleeding? (multiple answers possible)

- a. I empirically administer tranexamic acid
- b. I administer tranexamic acid after viscoelastic testing (TEG/ROTEM)
- c. Other, please specify

17. Do you give tranexamic-acid in massive bleeding critically ill patients who are considered...

|                                                             | Always | Most of the time | Sometimes | Never |
|-------------------------------------------------------------|--------|------------------|-----------|-------|
| A general bleeding ICU population                           |        |                  |           |       |
| Traumatic bleeding                                          |        |                  |           |       |
| Upper gastrointestinal tract bleeding                       |        |                  |           |       |
| Post-cardiothoracic surgery bleeding                        |        |                  |           |       |
| Obstetric bleeding                                          |        |                  |           |       |
| Sepsis + bleeding                                           |        |                  |           |       |
| Disseminated intravascular coagulation + bleeding           |        |                  |           |       |
| Extracorporeal membrane oxygenation + bleeding              |        |                  |           |       |
| Hemorrhagic stroke and/or traumatic brain injury + bleeding |        |                  |           |       |

## Red blood cell transfusion

The following questions concern ICU patients that have non-massive blood loss.

18. Which unit do you use to measure hemoglobin levels?
- g/dl
  - g/L (=mg/ml)
  - mmol/L

What is your threshold for red blood cell concentrate (RBC) transfusion in...

- ... a general population of non-massively bleeding critically ill patients?
  - ... traumatic non-massively bleeding critically ill patients?
  - ... upper gastrointestinal-tract non-massively bleeding critically ill patients?
  - ... post-cardiothoracic surgery non-massively bleeding critically ill patients?
  - ... obstetric non-massively bleeding critically ill patients?
  - ... septic non-massively bleeding critically ill patients?
  - ... non-massively bleeding critically ill patients on extracorporeal membrane oxygenation?
  - ... non-massively bleeding critically ill patients suffering from a hemorrhagic stroke and/or traumatic brain injury?
27. Do you check hemoglobin levels before transfusing a second unit of RBC in non-massively bleeding critically ill patients in the ICU?
- Always
  - Most of the time
  - Sometimes
  - Never

## Platelets

What is your threshold for platelet transfusion in...

- ... a general population of non-massively bleeding critically ill patients? ( $10^9$  cells/L)
  - ... traumatic non-massively bleeding critically ill patients? ( $10^9$  cells/L)
  - ... upper gastrointestinal-tract non-massively bleeding critically ill patients? ( $10^9$  cells/L)
  - ... post-cardiothoracic surgery non-massively bleeding critically ill patients? ( $10^9$  cells/L)
  - ... obstetric non-massively bleeding critically ill patients? ( $10^9$  cells/L)
  - ... non-massively bleeding critically ill patients suffering from sepsis and/or disseminated intravascular coagulation? ( $10^9$  cells/L)
  - ... non-massively bleeding critically ill patients on extracorporeal membrane oxygenation? ( $10^9$  cells/L)
  - ... non-massively bleeding critically ill patients suffering from a hemorrhagic stroke and/or traumatic brain injury? ( $10^9$  cells/L)
  - ... non-massively bleeding critically ill patients receiving anti-platelet therapy (e.g. acetylsalicylic acid, dipyridamol, clopidogrel, ticagrelor)? ( $10^9$  cells/L)
37. Do you check platelet count after transfusion of one unit thrombocyte concentrate before transfusing a second unit in non-massive bleeding critically ill patients in the ICU?
- Always
  - Most of the time
  - Sometimes
  - Never

## Plasma

38. Which coagulation test do you use in order to decide whether a non-massively bleeding critically ill patient could benefit from a plasma transfusion? (multiple answers possible)
- PT/INR
  - aPTT
  - Fibrinogen
  - Rotational thromboelastometry (ROTEM)
  - Thromboelastography (TEG)
  - Other, please specify
39. From which INR-value would you consider transfusing plasma to a general population of non-massively bleeding critically ill patients?
40. Do you check the PT/INR or perform TEG/ROTEM before transfusing a second unit of plasma in a non-massively bleeding critically ill patient with plasmatic coagulopathy?
- Always
  - Most of the time
  - Sometimes
  - Never

## Coagulation products

What is your threshold for administering fibrinogen in...

- ... a general population of non-massively bleeding critically ill patients? ( $10^9$  cells/L)
  - ... traumatic non-massively bleeding critically ill patients? ( $10^9$  cells/L)
  - ... upper gastrointestinal-tract non-massively bleeding critically ill patients? ( $10^9$  cells/L)
  - ... post-cardiothoracic surgery non-massively bleeding critically ill patients? ( $10^9$  cells/L)
  - ... obstetric non-massively bleeding critically ill patients? ( $10^9$  cells/L)
  - ... non-massively bleeding critically ill patients suffering from sepsis and/or disseminated intravascular coagulation? ( $10^9$  cells/L)
  - ... non-massively bleeding critically ill patients on extracorporeal membrane oxygenation? ( $10^9$  cells/L)
  - ... non-massively bleeding critically ill patients suffering from a hemorrhagic stroke and/or traumatic brain injury? ( $10^9$  cells/L)
49. What guides your use of tranexamic acid (TXA) in critically ill patients with non-massive bleeding?
- I empirically administer TXA
  - I administer TXA after viscoelastic testing (TEG/ROTEM)
  - Other (please specify)

Tranexamic-acid

50. Do you give tranexamic-acid in non-massively bleeding critically ill patients who are considered...

|                                                             | Always | Most of the time | Sometimes | Never |
|-------------------------------------------------------------|--------|------------------|-----------|-------|
| A general bleeding ICU population                           |        |                  |           |       |
| Traumatic bleeding                                          |        |                  |           |       |
| Upper gastrointestinal tract bleeding                       |        |                  |           |       |
| Post-cardiothoracic surgery bleeding                        |        |                  |           |       |
| Obstetric bleeding                                          |        |                  |           |       |
| Sepsis + bleeding                                           |        |                  |           |       |
| Disseminated intravascular coagulation + bleeding           |        |                  |           |       |
| Extracorporeal membrane oxygenation + bleeding              |        |                  |           |       |
| Hemorrhagic stroke and/or traumatic brain injury + bleeding |        |                  |           |       |
