# Supplementary material for: Transfusion practice in the bleeding critically ill: An international online survey—The TRACE‐2 survey
Source: PubMed Central journal article supplement — Transfusion. 2021 Dec 31;62(2):324–35. doi: 10.1111/trf.16789 (PMC9305497; doi:10.1111/trf.16789), 2021-12-31
Supplement: TRF-62-324-s002.pdf [file TRF-62-324-s002.pdf]

## **Transfusion practice in the bleeding critically ill; an international online survey – The TRACE-2 Survey**

### **Supplement 2: Overview of national intensive care societies endorsing the TRACE2-survey**

|                |                                                                           |
|----------------|---------------------------------------------------------------------------|
| Canada         | Canadian Critical Care Society (CCCS)                                     |
| France         | Société Française d'Anesthésie et de Réanimation (SFAR)                   |
| Greece         | Hellenic Society of Intensive Care (HSIC)                                 |
| Japan          | Japanese Society of Intensive Care Medicine (JSICM)                       |
| Lebanon        | Lebanese Critical Care Society (LCCS)                                     |
| Taiwan         | Society of Emergency & Critical Care Medicine, Taiwan, R.O.C.(SECCM)      |
| Turkey         | Turkish Society of Medical and Surgical Intensive Care Medicine (TSMSICM) |
| United Kingdom | Intensive Care Society (ICS)                                              |
