# Supplementary material for: Transfusion practice in the bleeding critically ill: An international online survey—The TRACE‐2 survey
Source: PubMed Central journal article supplement — Transfusion. 2021 Dec 31;62(2):324–35. doi: 10.1111/trf.16789 (PMC9305497; doi:10.1111/trf.16789), 2021-12-31
Supplement: TRF-62-324-s003.pdf [file TRF-62-324-s003.pdf]

# Transfusion practice in the bleeding critically ill; an international online survey

## – The TRACE-2 Survey

### Supplement 3: Supplemental tables

**Table S1.** Difference between respondents with and without a massive transfusion protocol

**Table S2.** Difference between respondents with anaesthesiology and internal medicine as base specialty

**Table S3.** Difference between respondents with and without a hospital wide transfusion protocol **Table S4.**

Difference between respondents with and without an ICU-specific transfusion protocol

|                                                                                                                                                                                                       | Massive transfusion protocol (N= 209) | No massive transfusion protocol (N= 192) | P-value |
|-------------------------------------------------------------------------------------------------------------------------------------------------------------------------------------------------------|---------------------------------------|------------------------------------------|---------|
| What kind of plasma do you use during massive transfusion?                                                                                                                                            |                                       |                                          |         |
| Pooled plasma (e.g. Omniplasma)                                                                                                                                                                       | 19(9%)                                | 10(5%)                                   | 0.191   |
| Fresh frozen plasma                                                                                                                                                                                   | 196(94%)                              | 174(91%)                                 | 0.32    |
| Lyophilized plasma                                                                                                                                                                                    | 7(3%)                                 | 5(3%)                                    | 0.885   |
| What guides the choice of type of blood products prescribed to patients requiring massive transfusion?                                                                                                |                                       |                                          |         |
| I use fixed ratios of blood products                                                                                                                                                                  | 120(57%)                              | 64(33%)                                  | p<0.001 |
| Conventional lab based testing (e.g. International Normalized Ratio (INR), platelet count , fibrinogen, hemoglobin)                                                                                   | 133(64%)                              | 135(70%)                                 | 0.189   |
| Point of care viscoelastic testing (Thromboelastography (TEG) or Thromboelastometry (ROTEM))                                                                                                          | 101(48%)                              | 62(32%)                                  | 0.002   |
| What ratio of blood products do you use during massive transfusion (one platelet concentrate = pooled product from 5 donors)                                                                          |                                       |                                          |         |
| 1 : 1 : 1 (red blood cells : plasma : platelets concentrate)                                                                                                                                          | 43(21%)                               | 17(9%)                                   | 0.023   |
| 3 : 3 : 1 (red blood cells : plasma : platelets concentrate)                                                                                                                                          | 29(14%)                               | 16(8%)                                   |         |
| 6 : 6 : 1 (red blood cells : plasma : platelets concentrate)                                                                                                                                          | 11(5%)                                | 8(4%)                                    |         |
| 6 : 3 : 1 (red blood cells : plasma : platelets concentrate)                                                                                                                                          | 10(5%)                                | 13(7%)                                   |         |
| Other (please specify)                                                                                                                                                                                | 29(14%)                               | 9(5%)                                    |         |
| Whole blood                                                                                                                                                                                           | 0(0%)                                 | 2(1%)                                    |         |
| How do you correct a plasmatic coagulopathy (INRx1.5 reference value or prolonged clotting time with TEG or ROTEM) in critically ill patients with massive blood loss who used vitamin K antagonists? |                                       |                                          |         |
| Vitamin K                                                                                                                                                                                             | 144(69%)                              | 130(68%)                                 | 0.882   |
| Prothrombin complex (Cofact/Octoplex/Beriplex)                                                                                                                                                        | 178(85%)                              | 136(71%)                                 | 0.001   |
| Plasma                                                                                                                                                                                                | 114(55%)                              | 132(69%)                                 | 0.005   |
| Nothing                                                                                                                                                                                               | 1(0%)                                 | 2(1%)                                    | 0.941   |
| How do you correct a plasmatic coagulopathy in critically ill patients with massive blood loss who used direct oral anti-coagulants(DOACs)?                                                           |                                       |                                          |         |
| Vitamin K                                                                                                                                                                                             | 45(22%)                               | 47(24%)                                  | 0.56    |
| Prothrombin complex (Cofact/Octoplex/Beriplex)                                                                                                                                                        | 155(74%)                              | 118(61%)                                 | 0.009   |
| Plasma                                                                                                                                                                                                | 119(57%)                              | 137(71%)                                 | 0.004   |
| Recombinant factor VIIa (Novoseven/Eptacog $\alpha\pm$ )                                                                                                                                              | 32(15%)                               | 36(19%)                                  | 0.433   |
| Idarucizumab (for dabigatran)                                                                                                                                                                         | 119(57%)                              | 75(39%)                                  | 0.001   |
| Andexanet (for rivaroxaban or apixaban)                                                                                                                                                               | 51(24%)                               | 33(17%)                                  | 0.099   |
| Nothing                                                                                                                                                                                               | 3(1%)                                 | 3(2%)                                    | 1       |
| What guides your use of fibrinogen in critically ill patients with massive bleeding?                                                                                                                  |                                       |                                          |         |
| I administer fibrinogen after lab testing (fibrinogen level)                                                                                                                                          | 67(32%)                               | 79(41%)                                  | 0.331   |
| I administer fibrinogen after viscoelastic testing (TEG/ROTEM)                                                                                                                                        | 41(20%)                               | 37(19%)                                  |         |
| I empirically administer fibrinogen                                                                                                                                                                   | 26(12%)                               | 17(9%)                                   |         |

|                                                                                                                            |          |          |       |
|----------------------------------------------------------------------------------------------------------------------------|----------|----------|-------|
| I empirically administer fibrinogen, but start titrating when first lab results are available                              | 69(33%)  | 52(27%)  |       |
| Other                                                                                                                      | 6(3%)    | 6(3%)    |       |
| What guides your use of prothrombin complex (Cofact, Octoplex, Beriplex) in critically ill patients with massive bleeding. |          |          |       |
| I administer prothrombin complex after lab testing (PT/INR)                                                                | 77(37%)  | 80(42%)  | 0.494 |
| I administer prothrombin complex after viscoelastic testing (TEG/ROTEM)                                                    | 54(26%)  | 37(19%)  |       |
| I empirically administer prothrombin complex                                                                               | 14(7%)   | 10(5%)   |       |
| I empirically administer prothrombin complex, but start titrating when first lab results are available                     | 44(21%)  | 41(21%)  |       |
| Other                                                                                                                      | 19(9%)   | 21(11%)  |       |
| Do you use tranexamic acid in critically ill patients with massive bleeding?                                               |          |          |       |
| Yes                                                                                                                        | 201(96%) | 173(90%) | 0.019 |
| No                                                                                                                         | 7(3%)    | 19(10%)  |       |
| What guides your use of tranexamic acid in critically ill patients with massive bleeding?                                  |          |          |       |
| I administer tranexamic acid after viscoelastic testing (TEG/ROTEM)                                                        | 18(9%)   | 15(8%)   | 0.040 |
| I empirically administer TXA                                                                                               | 180(86%) | 152(79%) |       |
| Other                                                                                                                      | 4(2%)    | 5(3%)    |       |
| Primary medical specialty                                                                                                  |          |          |       |
| Anesthesiology                                                                                                             | 127(61%) | 116(60%) | 0.025 |
| Cardiology                                                                                                                 | 1(0%)    | 6(3%)    |       |
| Internal medicine                                                                                                          | 41(20%)  | 37(19%)  |       |
| Neurology                                                                                                                  | 1(0%)    | 0(0%)    |       |
| Other (please specify)                                                                                                     | 31(15%)  | 16(8%)   |       |
| Pulmology                                                                                                                  | 2(1%)    | 11(6%)   |       |
| Surgery                                                                                                                    | 5(2%)    | 4(2%)    |       |
| Certification level                                                                                                        |          |          |       |
| Intensivist                                                                                                                | 176(84%) | 161(84%) | 0.451 |
| Specialist non-intensivist practising ICU                                                                                  | 18(9%)   | 15(8%)   |       |
| Resident, specialist in training                                                                                           | 11(5%)   | 15(8%)   |       |
| Other                                                                                                                      | 4(2%)    | 1(1%)    |       |
| Type of ICU                                                                                                                |          |          |       |
| Mixed ICU                                                                                                                  | 159(76%) | 135(70%) | 0.011 |
| Medical ICU                                                                                                                | 8(4%)    | 25(13%)  |       |
| Surgical ICU                                                                                                               | 36(17%)  | 28(15%)  |       |
| Other (please specify)                                                                                                     | 4(2%)    | 4(2%)    |       |
| Number of ICU beds                                                                                                         |          |          |       |
| <10                                                                                                                        | 51(24%)  | 44(23%)  | 0.143 |
| 10-15                                                                                                                      | 53(25%)  | 71(37%)  |       |
| 16-20                                                                                                                      | 36(17%)  | 28(15%)  |       |
| >20                                                                                                                        | 68(33%)  | 48(25%)  |       |
| Type of institution                                                                                                        |          |          |       |
| University hospital                                                                                                        | 100(48%) | 78(41%)  | 0.231 |
| University affiliated hospital                                                                                             | 56(27%)  | 48(25%)  |       |
| Non-university public hospital                                                                                             | 39(19%)  | 43(22%)  |       |

|                                       |         |         |       |
|---------------------------------------|---------|---------|-------|
| Private hospital                      | 14(7%)  | 22(11%) |       |
| Other (please specify)                | 0(0%)   | 1(1%)   |       |
| Availability of transfusion guideline |         |         |       |
| Hospital-wide transfusion protocol    | 89(43%) | 91(47%) | 0.386 |
| ICU-specific transfusion protocol     | 73(35%) | 86(45%) | 0.056 |

**Table S1.** Difference between respondents with and without a massive transfusion protocol

|                                                       | Anesthesiology<br>(N= 243) | Internal medicine<br>(N= 78) | P-value |
|-------------------------------------------------------|----------------------------|------------------------------|---------|
| Hemoglobin threshold in different subpopulations      |                            |                              |         |
| General ICU population                                | 7[7-7.5]                   | 7[7-7]                       | 0.17    |
| Trauma patients                                       | 7.6[7-8]                   | 7.2[7-8]                     | 0.619   |
| Upper gastro-intestinal bleeding                      | 7[7-8]                     | 7[7-8]                       | 0.2     |
| Post cardiothoracic surgery                           | 8[8-9]                     | 8[7.4-9]                     | 0.217   |
| Obstetric patients                                    | 7[7-8]                     | 7[7-8]                       | 0.941   |
| Patients with Sepsis                                  | 7[7-8]                     | 7[7-7.5]                     | 0.076   |
| Patients on ECMO                                      | 8[7-9]                     | 8[7-9]                       | 0.842   |
| Patients with TBI or stroke                           | 8[7.4-9]                   | 8[7-9]                       | 0.044   |
| Platelet count thresholds in different subpopulations |                            |                              |         |
| General ICU population                                | 50[20-50]                  | 50[20-50]                    | 0.099   |
| Trauma patients                                       | 50[50-79]                  | 50[50-51]                    | 0.087   |
| Upper gastro-intestinal bleeding                      | 50[50-72]                  | 50[50-50]                    | 0.136   |
| Post cardiothoracic surgery                           | 60[50-90]                  | 50[50-70]                    | 0.008   |
| Obstetric patients                                    | 50[50-80]                  | 50[50-50]                    | 0.016   |
| Patients with Sepsis                                  | 50[21-50]                  | 50[20-50]                    | 0.042   |
| Patients on ECMO                                      | 50[49-80]                  | 50[43-77]                    | 0.854   |
| Patients with TBI or stroke                           | 80[50-100]                 | 70[50-100]                   | 0.06    |
| value.anti_platelet                                   | 55[50-100]                 | 50[50-76.25]                 | 0.034   |
| Fibrin thresholds in different subpopulations         |                            |                              |         |
| General ICU population                                | 1.5[1-1.8]                 | 1.5[1-1.5]                   | 0.685   |
| Trauma patients                                       | 1.5[1-2]                   | 1.5[1-2]                     | 0.111   |
| Upper gastro-intestinal bleeding                      | 1.5[1-2]                   | 1.5[1-2]                     | 0.326   |
| Post cardiothoracic surgery                           | 1.5[1-2]                   | 1.5[1-1.7]                   | 0.155   |
| Obstetric patients                                    | 1.5[1.2-2]                 | 1.5[1-1.5]                   | 0.005   |
| Patients with Sepsis                                  | 1.5[1-2]                   | 1.5[1-1.5]                   | 0.167   |
| Patients on ECMO                                      | 1.5[1-2]                   | 1.5[1-1.5]                   | 0.051   |
| Patients with TBI or stroke                           | 1.5[1.2-2]                 | 1.5[1-2]                     | 0.277   |
| Certification level                                   |                            |                              | 0.372   |
| Intensivist                                           | 199(82%)                   | 70(90%)                      |         |
| Specialist non-intensivist practising ICU             | 25(10%)                    | 4(5%)                        |         |
| Resident, specialist in training                      | 17(7%)                     | 4(5%)                        |         |
| Other                                                 | 2(1%)                      | 0(0%)                        |         |
| Type of ICU                                           |                            |                              | p<0.001 |
| Medical ICU                                           | 7(3%)                      | 18(23%)                      |         |
| Surgical ICU                                          | 58(24%)                    | 3(4%)                        |         |
| Mixed ICU                                             | 171(70%)                   | 56(72%)                      |         |
| Other                                                 | 5(2%)                      | 1(1%)                        |         |
| Number of ICU beds                                    |                            |                              | 0.906   |
| <10                                                   | 59(24%)                    | 17(22%)                      |         |
| 10-15                                                 | 70(29%)                    | 24(31%)                      |         |
| 16-20                                                 | 43(18%)                    | 13(17%)                      |         |
| >20                                                   | 69(28%)                    | 24(31%)                      |         |
| Type of institution                                   |                            |                              | 0.081   |
| University hospital                                   | 110(45%)                   | 29(37%)                      |         |
| University affiliated hospital                        | 64(26%)                    | 26(33%)                      |         |
| Non-university public hospital                        | 50(21%)                    | 11(14%)                      |         |
| Private hospital                                      | 19(8%)                     | 12(15%)                      |         |
| Availability of transfusion guideline                 |                            |                              |         |

|                                    |          |         |       |
|------------------------------------|----------|---------|-------|
| Hospital-wide transfusion protocol | 110(45%) | 32(41%) | 0.514 |
| ICU-specific transfusion protocol  | 89(37%)  | 37(47%) | 0.107 |
| Massive transfusion protocol       | 127(52%) | 41(53%) | 1     |

**Table S2.** Difference between respondents with anesthesiology and internal medicine as base specialty

|                                                       | No hospital-wide transfusion protocol (N=221) | Hospital-wide transfusion protocol (N=180) | P-value |
|-------------------------------------------------------|-----------------------------------------------|--------------------------------------------|---------|
| Hemoglobin threshold in different subpopulations      |                                               |                                            |         |
| General ICU population                                | 7[7-7.5]                                      | 7[7-7]                                     | 0.246   |
| Trauma patients                                       | 7.5[7-8]                                      | 7.1[7-8]                                   | 0.563   |
| Upper gastro-intestinal bleeding                      | 7[7-8]                                        | 7[7-8]                                     | 0.326   |
| Post cardiothoracic surgery                           | 8[8-9]                                        | 8[7.8-9]                                   | 0.057   |
| Obstetric patients                                    | 7[7-8]                                        | 7[7-8]                                     | 0.918   |
| Patients with Sepsis                                  | 7[7-8]                                        | 7[7-8]                                     | 0.654   |
| Patients on ECMO                                      | 8[7-9]                                        | 8[7.1-9]                                   | 0.141   |
| Patients with TBI or stroke                           | 8[7-9]                                        | 8[7-9]                                     | 0.581   |
| Platelet count thresholds in different subpopulations |                                               |                                            |         |
| General ICU population                                | 50[20-50]                                     | 49.5[20-50]                                | 0.103   |
| Trauma patients                                       | 50[50-70]                                     | 50[50-70]                                  | 0.326   |
| Upper gastro-intestinal bleeding                      | 50[50-70]                                     | 50[49-53]                                  | 0.013   |
| Post cardiothoracic surgery                           | 50[50-89]                                     | 50[50-80]                                  | 0.049   |
| Obstetric patients                                    | 50[50-71]                                     | 50[49-70]                                  | 0.133   |
| Patients with Sepsis                                  | 50[20-50]                                     | 50[20-50]                                  | 0.791   |
| Patients on ECMO                                      | 50[49-80]                                     | 50[48-80]                                  | 0.93    |
| Patients with TBI or stroke                           | 75[50-100]                                    | 70[50-100]                                 | 0.195   |
| value.anti_platelet                                   | 51[50-100]                                    | 50[40-100]                                 | 0.12    |
| Fibrin thresholds in different subpopulations         |                                               |                                            |         |
| General ICU population                                | 1.5[1-1.5]                                    | 1.5[1-2]                                   | 0.753   |
| Trauma patients                                       | 1.5[1-2]                                      | 1.5[1-2]                                   | 0.124   |
| Upper gastro-intestinal bleeding                      | 1.5[1-2]                                      | 1.5[1-2]                                   | 0.252   |
| Post cardiothoracic surgery                           | 1.5[1-2]                                      | 1.5[1-2]                                   | 0.895   |
| Obstetric patients                                    | 1.5[1.1-2]                                    | 1.5[1-2]                                   | 0.679   |
| Patients with Sepsis                                  | 1.5[1-1.8]                                    | 1.5[1-2]                                   | 0.967   |
| Patients on ECMO                                      | 1.5[1-2]                                      | 1.5[1-2]                                   | 0.58    |
| Patients with TBI or stroke                           | 1.5[1.5-2]                                    | 1.5[1-2]                                   | 0.563   |
| Type of ICU                                           |                                               |                                            | 0.192   |
| Medical ICU                                           | 18(8%)                                        | 15(8%)                                     |         |
| Surgical ICU                                          | 40(18%)                                       | 24(13%)                                    |         |
| Mixed ICU                                             | 159(72%)                                      | 135(75%)                                   |         |
| Other                                                 | 2(1%)                                         | 6(3%)                                      |         |
| Number of ICU beds                                    |                                               |                                            | 0.125   |
| <10                                                   | 63(29%)                                       | 32(18%)                                    |         |
| 10-15                                                 | 68(31%)                                       | 56(31%)                                    |         |
| 16-20                                                 | 31(14%)                                       | 33(18%)                                    |         |
| >20                                                   | 58(26%)                                       | 58(32%)                                    |         |
| Type of institution                                   |                                               |                                            | 0.689   |
| University hospital                                   | 95(43%)                                       | 83(46%)                                    |         |
| University affiliated hospital                        | 56(25%)                                       | 48(27%)                                    |         |
| Non-university public hospital                        | 46(21%)                                       | 36(20%)                                    |         |
| Private hospital                                      | 23(10%)                                       | 13(7%)                                     |         |
| Other                                                 | 1(0%)                                         | 0(0%)                                      |         |
| Availability of transfusion guideline                 |                                               |                                            |         |
| ICU-specific transfusion protocol                     | 120(54%)                                      | 39(22%)                                    | p<0.001 |
| Massive transfusion protocol                          | 120(54%)                                      | 89(49%)                                    | 0.354   |

**Table S3.** Difference between respondents with and without a hospital wide transfusion protocol

|                                                       | No ICU-specific transfusion protocol (N= 242) | ICU-specific transfusion protocol (N= 159) | P-value |
|-------------------------------------------------------|-----------------------------------------------|--------------------------------------------|---------|
| Hemoglobin threshold in different subpopulations      |                                               |                                            |         |
| General ICU population                                | 7[7-7]                                        | 7[7-7.5]                                   | 0.937   |
| Trauma patients                                       | 7.05[7-8]                                     | 7.9[7-8]                                   | 0.315   |
| Upper gastro-intestinal bleeding                      | 7[7-8]                                        | 7[7-8]                                     | 0.542   |
| Post cardiothoracic surgery                           | 8[7.7-9]                                      | 8[8-9]                                     | 0.723   |
| Obstetric patients                                    | 7[7-8]                                        | 7[7-8]                                     | 0.946   |
| Patients with Sepsis                                  | 7[7-8]                                        | 7[7-8]                                     | 0.573   |
| Patients on ECMO                                      | 8[7.2-9]                                      | 8[7-9]                                     | 0.026   |
| Patients with TBI or stroke                           | 8[7-9]                                        | 8[7-9]                                     | 0.305   |
| Platelet count thresholds in different subpopulations |                                               |                                            |         |
| General ICU population                                | 50[20-50]                                     | 50[20-50]                                  | 0.861   |
| Trauma patients                                       | 50[50-70]                                     | 50[50-75]                                  | 0.868   |
| Upper gastro-intestinal bleeding                      | 50[50-51.5]                                   | 50[50-70]                                  | 0.321   |
| Post cardiothoracic surgery                           | 50[50-80]                                     | 50[50-80.5]                                | 0.901   |
| Obstetric patients                                    | 50[50-70]                                     | 50[50-70]                                  | 0.673   |
| Patients with Sepsis                                  | 50[20-50]                                     | 50[20-50]                                  | 0.258   |
| Patients on ECMO                                      | 50[49.75-80]                                  | 50[34.75-80]                               | 0.769   |
| Patients with TBI or stroke                           | 71[50-100]                                    | 75[50-100]                                 | 0.759   |
| value.anti_platelet                                   | 50[50-100]                                    | 50[49.75-100]                              | 0.344   |
| Fibrin thresholds in different subpopulations         |                                               |                                            |         |
| General ICU population                                | 1.5[1-1.5]                                    | 1.5[1-1.92]                                | 0.424   |
| Trauma patients                                       | 1.5[1-2]                                      | 1.5[1-2]                                   | 0.911   |
| Upper gastro-intestinal bleeding                      | 1.5[1-2]                                      | 1.5[1-2]                                   | 0.641   |
| Post cardiothoracic surgery                           | 1.5[1-2]                                      | 1.5[1-2]                                   | 0.421   |
| Obstetric patients                                    | 1.5[1.1-2]                                    | 1.5[1-2]                                   | 0.241   |
| Patients with Sepsis                                  | 1.5[1-1.9]                                    | 1.5[1-1.92]                                | 0.355   |
| Patients on ECMO                                      | 1.5[1-2]                                      | 1.5[1-2]                                   | 0.698   |
| Patients with TBI or stroke                           | 1.5[1.5-2]                                    | 1.5[1-2]                                   | 0.239   |
| Type of ICU                                           |                                               |                                            | 0.094   |
| Medical ICU                                           | 16(7%)                                        | 17(11%)                                    |         |
| Surgical ICU                                          | 46(19%)                                       | 18(11%)                                    |         |
| Mixed ICU                                             | 172(71%)                                      | 122(77%)                                   |         |
| Other                                                 | 6(2%)                                         | 2(1%)                                      |         |
| Number of ICU beds                                    |                                               |                                            | 0.086   |
| <10                                                   | 56(23%)                                       | 39(25%)                                    |         |
| 10-15                                                 | 75(31%)                                       | 49(31%)                                    |         |
| 16-20                                                 | 38(16%)                                       | 26(16%)                                    |         |
| >20                                                   | 71(29%)                                       | 45(28%)                                    |         |
| Type of institution                                   |                                               |                                            | 0.835   |
| University hospital                                   | 111(46%)                                      | 67(42%)                                    |         |
| University affiliated hospital                        | 56(23%)                                       | 48(30%)                                    |         |
| Non-university public hospital                        | 57(24%)                                       | 25(16%)                                    |         |
| Private hospital                                      | 18(7%)                                        | 18(11%)                                    |         |
| Availability of transfusion guideline                 |                                               |                                            |         |
| Hospital-wide transfusion protocol                    | 141(58%)                                      | 39(25%)                                    | p<0.001 |
| Massive transfusion protocol                          | 136(56%)                                      | 73(46%)                                    | 0.053   |

**Table S4.** Difference between respondents with and without an ICU-specific transfusion protocol
