# Supplementary material for: Transfusion practice in the bleeding critically ill: An international online survey—The TRACE‐2 survey
Source: PubMed Central journal article supplement — Transfusion. 2021 Dec 31;62(2):324–35. doi: 10.1111/trf.16789 (PMC9305497; doi:10.1111/trf.16789), 2021-12-31
Supplement: TRF-62-324-s004.pdf [file TRF-62-324-s004.pdf]

# **Transfusion practice in the bleeding critically ill; an international online survey – The TRACE-2 Survey**

## **Supplement 4: Supplemental figures**

**Figure S1.** Effect of Hb check and platelet count check on Hb and platelet count threshold

**Figure S2.** Hb threshold in different continents

**Figure S3.** Platelet count threshold in different continents

**Figure S4.** Hb threshold and income country

**Figure S5.** Platelet count threshold and income country

**Figure S6.** Hb threshold in different regions within Europe

**Figure S7.** Platelet count threshold in different regions within Europe

**Figure S8.** Hb threshold in different regions within Asia

**Figure S9.** Platelet count threshold in different regions within Asia

### **Note:**

Each boxplot represents the medians with first and third quartile. The upper and lower whiskers show the largest observation less than or equal to  $Q3 + 1.5 \times$  the interquartile range and the lowest observation or higher than  $Q1 - 1.5 \times$  interquartile range, respectively.

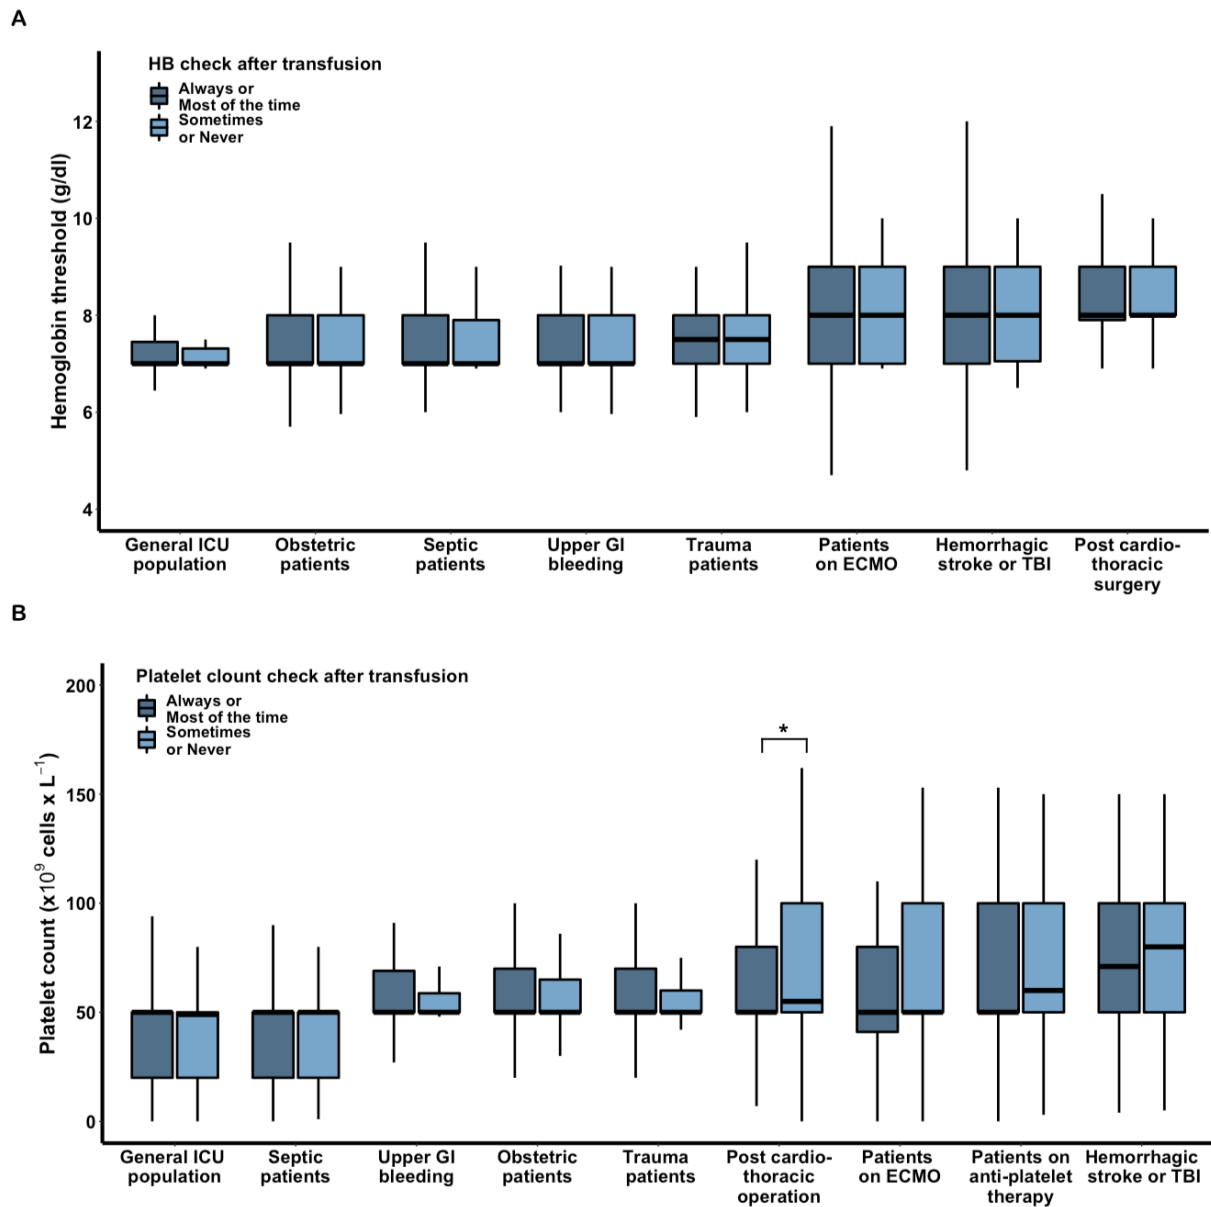

**Figure S1.** Effect of Hb check and platelet count check on Hb and platelet count threshold

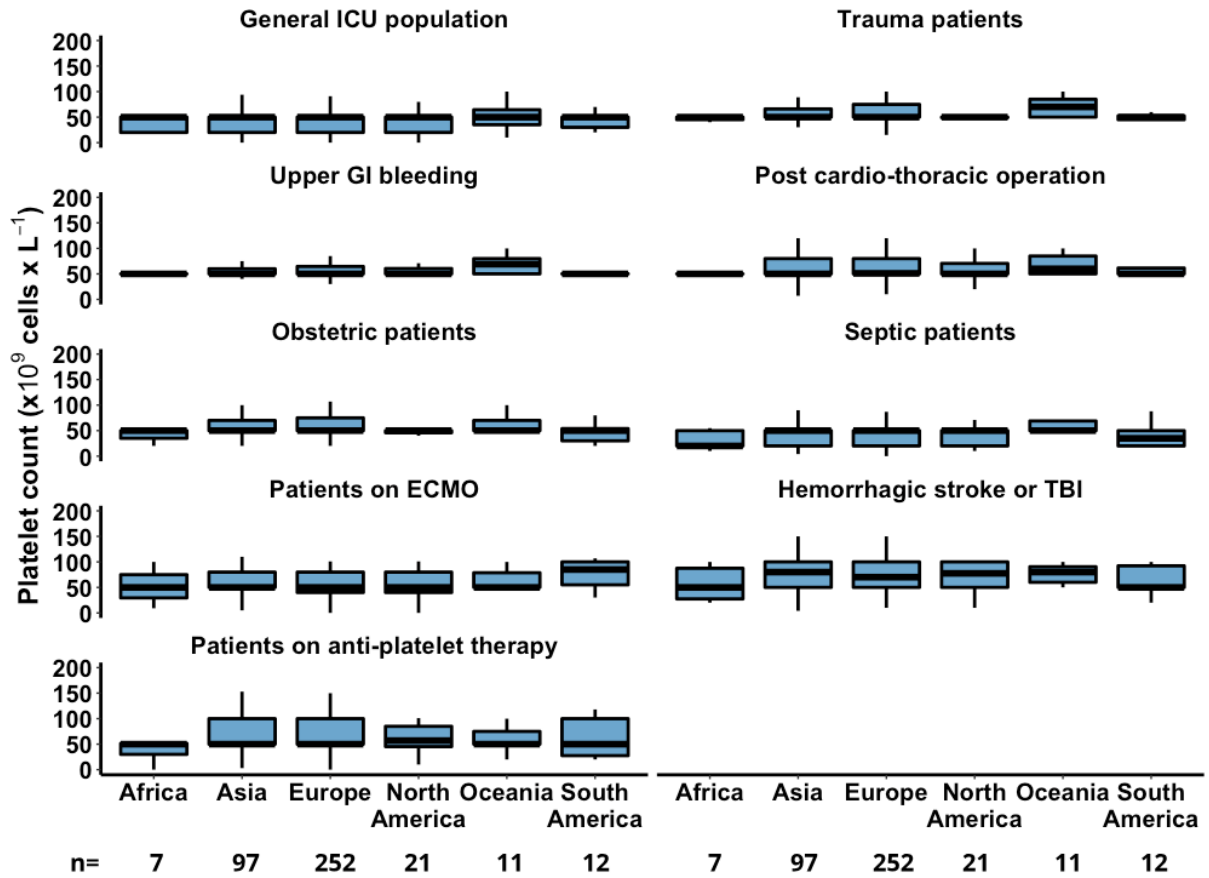

**Figure S2** Platelet count threshold in different continents

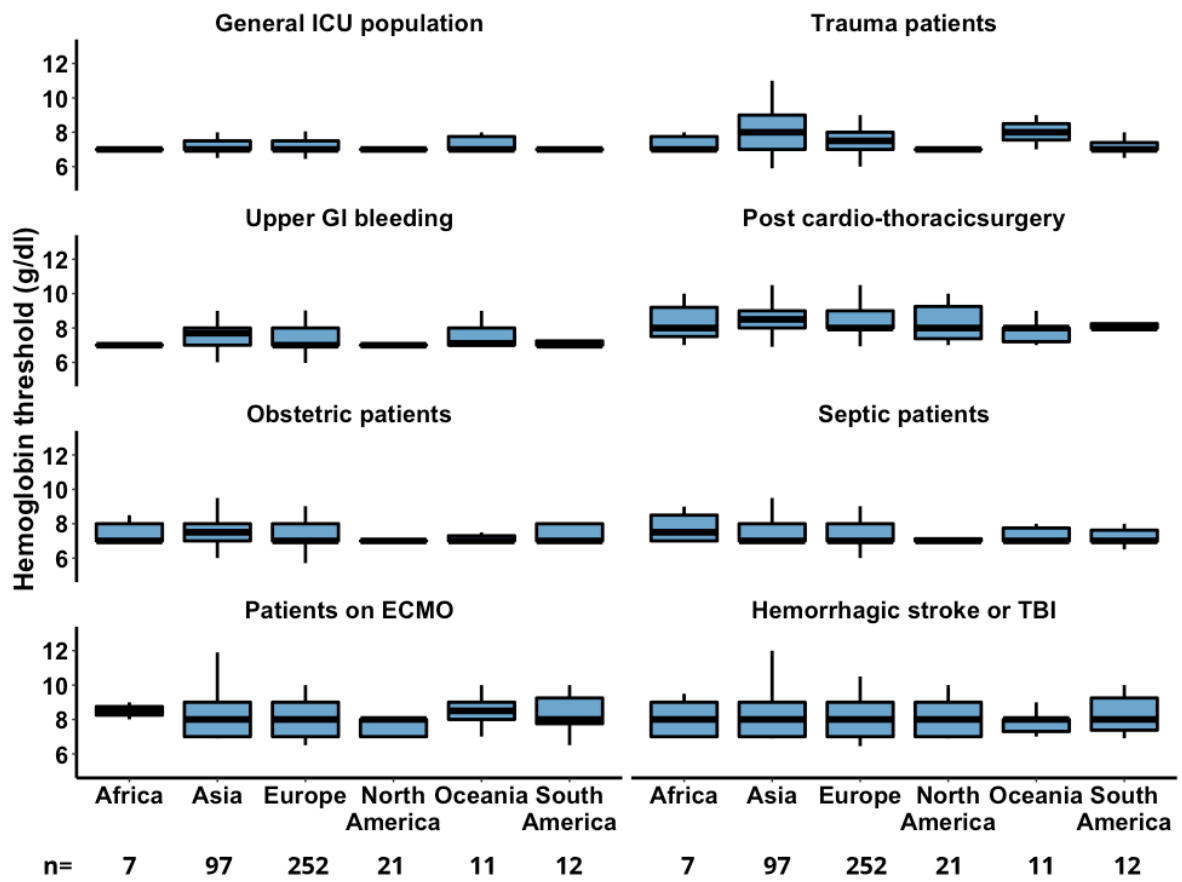

**Figure S3** Hb threshold in different continents

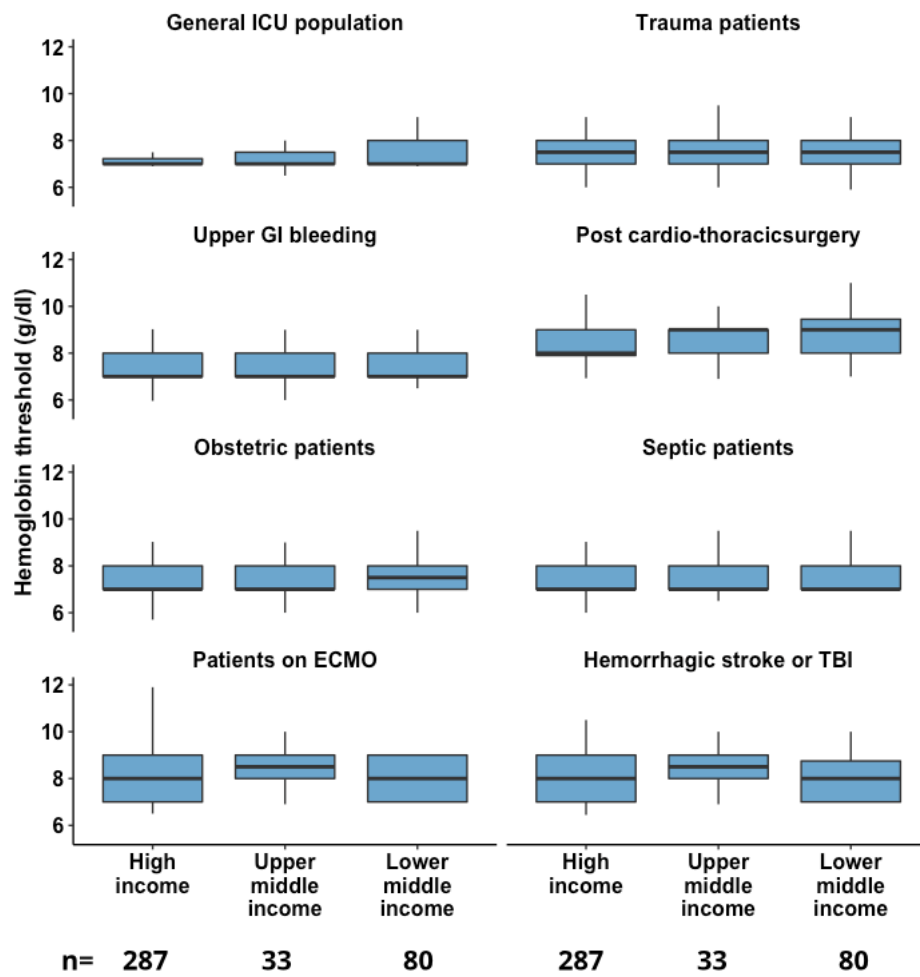

**Figure S4** Hb threshold divided in high, upper middle and lower middle-income countries. Low income countries were not represented in this survey.

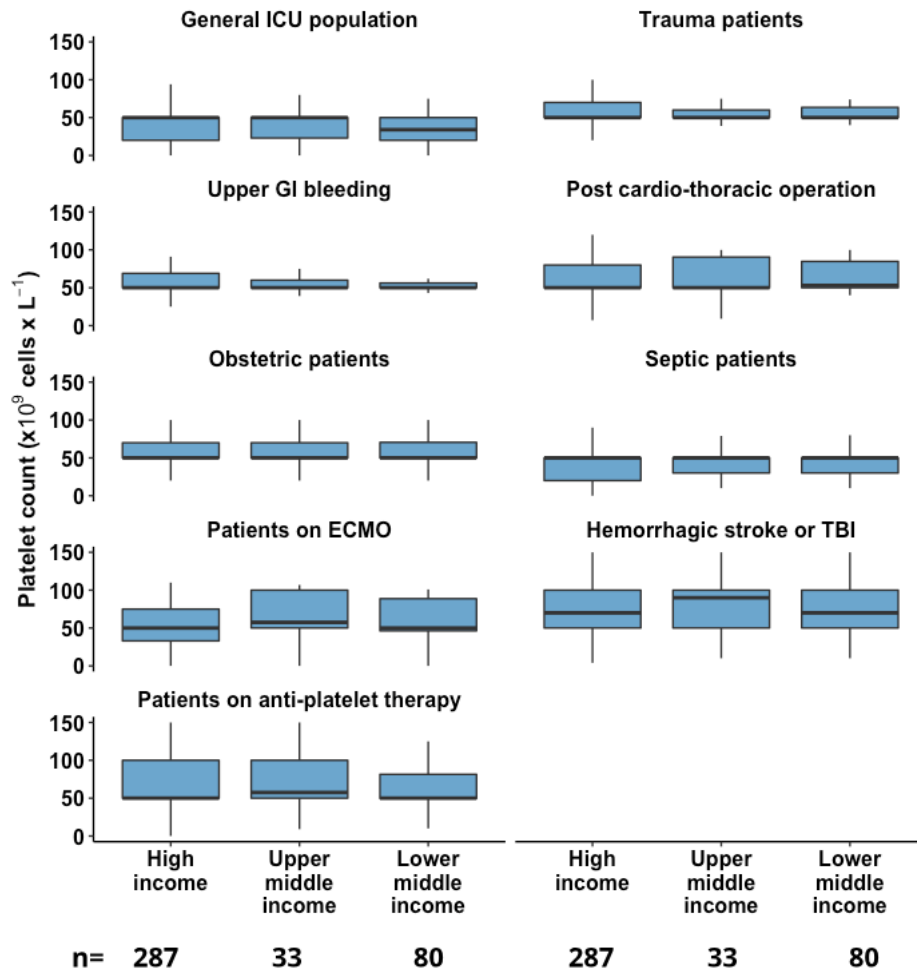

**Figure S5** Platelet count threshold divided in high(n=287), upper middle(n=33) and lower middle-income (n=80 respondents) countries. Low income countries were not represented in this survey.

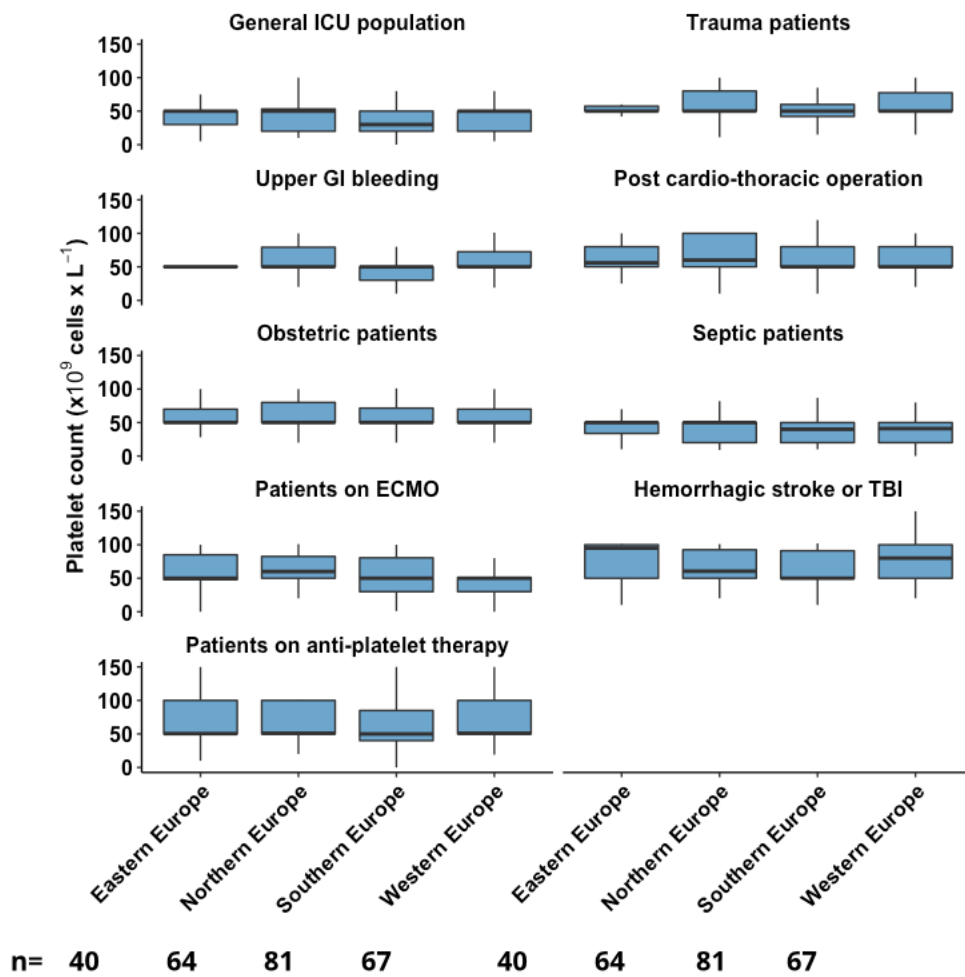

**Figure S6** Hb threshold in different regions within Europe. Only regions with  $\geq 10$  respondents are presented in this figure.

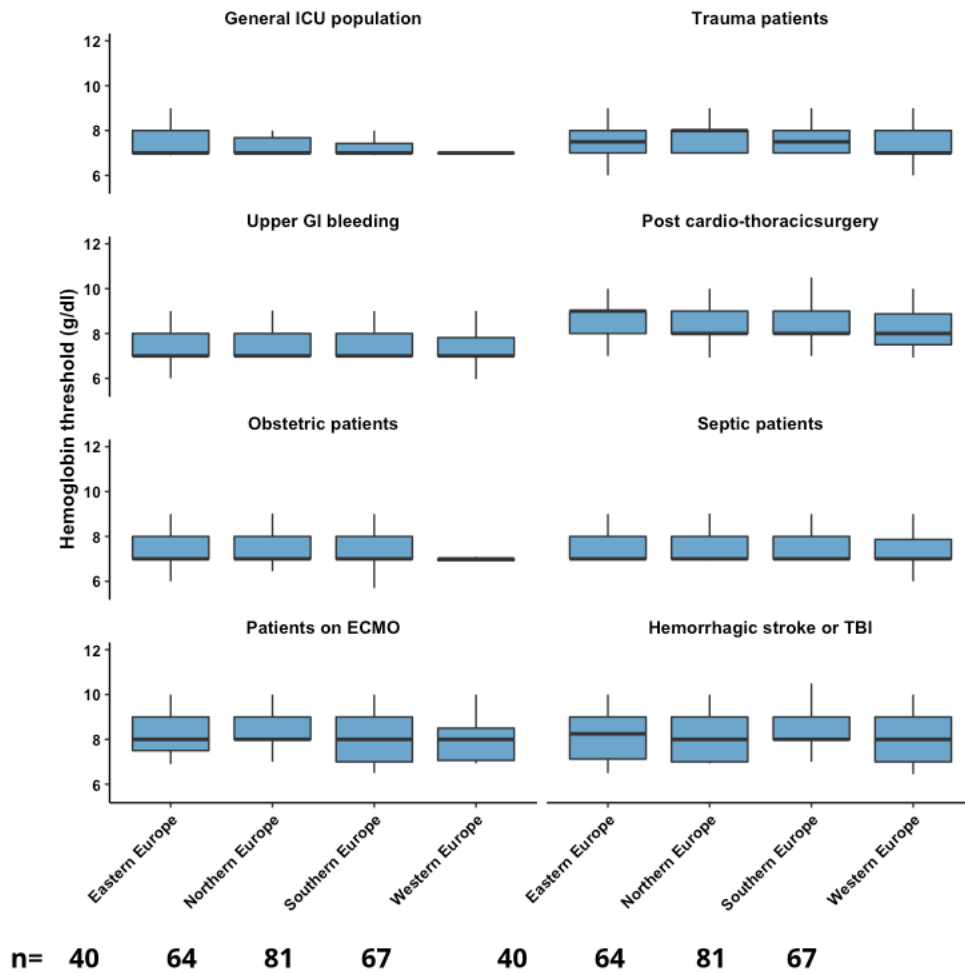

**Figure S7** Hb threshold in different regions within Europe. Only regions with  $\geq 10$  respondents are presented in this figure.



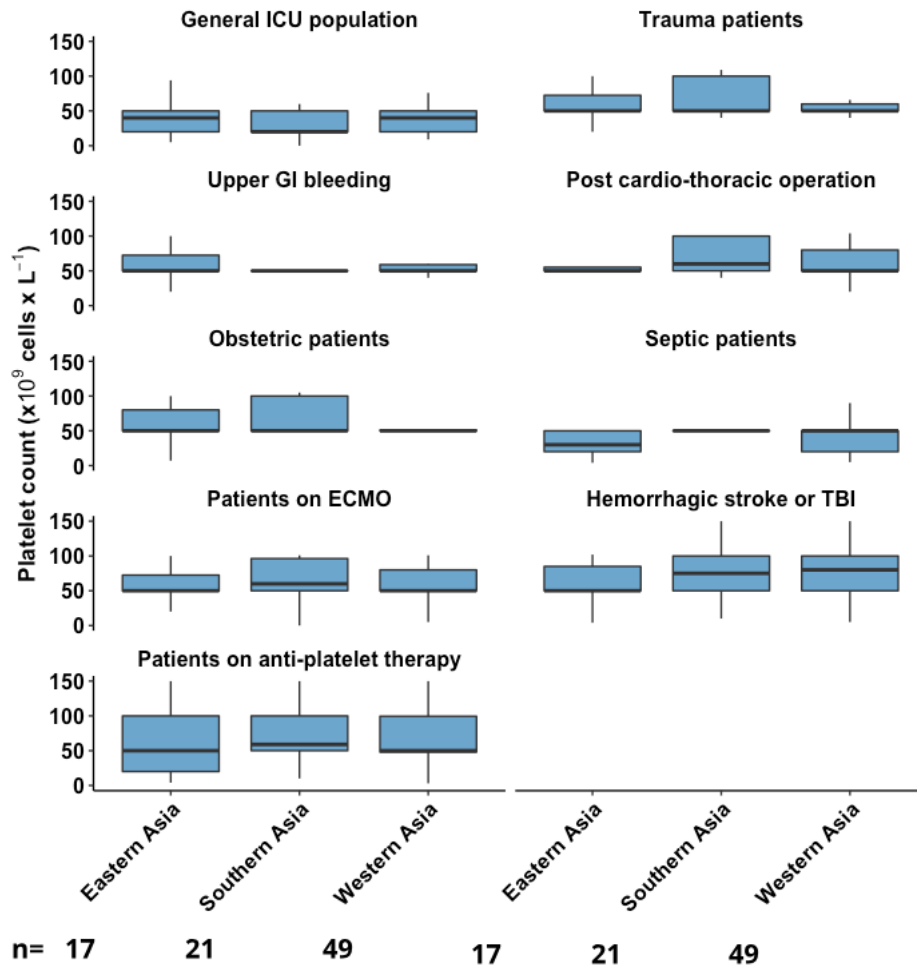

**Figure S8** Platelet count thresholds in different regions within Asia. Only regions with  $\geq 10$  respondents are presented in this figure.

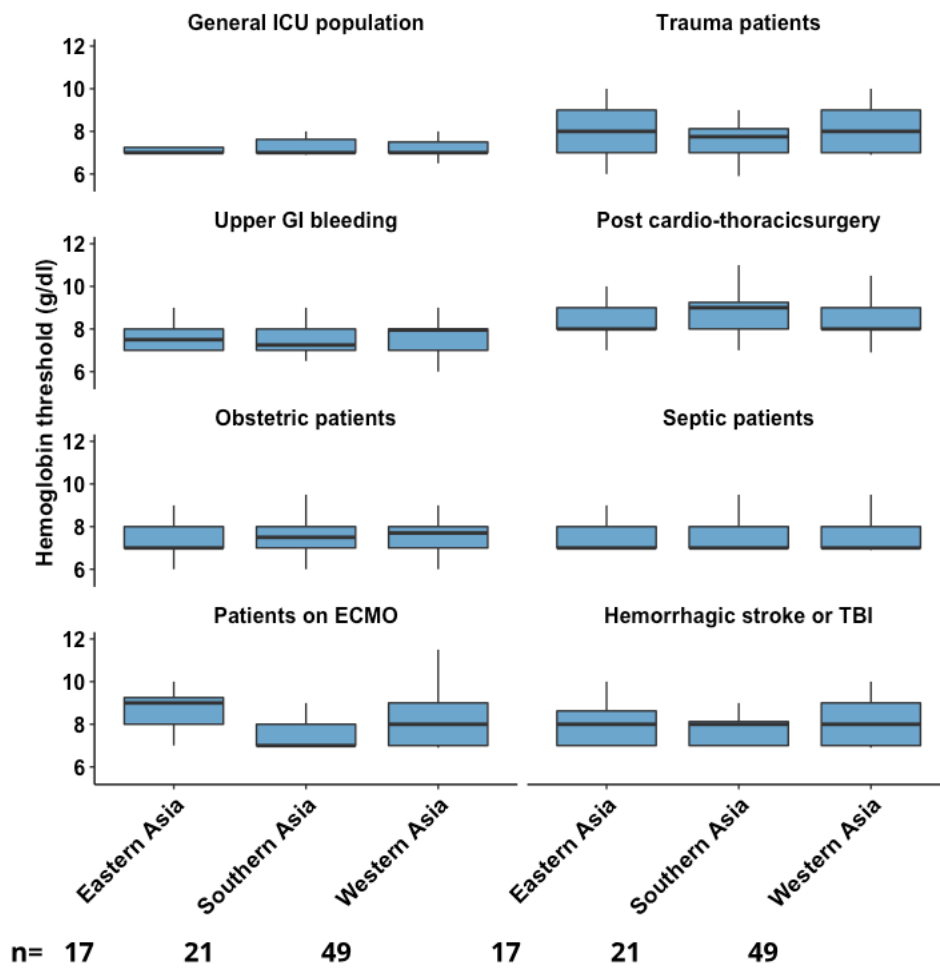

**Figure S9** Platelet count threshold in different regions within Asia. Only regions with  $\geq 10$  respondents are presented in this figure.
